# Supplementary material
Source: publisher site journal article supplement (http://content.karger.com/ProdukteDB/miscArchiv/000/231/567/000231567_sm_Suppl.-Tables.pdf)
Supplement: Supplementary file 1 [file 000231567_sm_Suppl.-Tables.pdf]

**Supplementary table 1.** Sequences of the primers for quantitative PCR of the 21 *SLC26A4* exons

| Exons   | Sequence (5 -3 )                                              | Product size, bp |
|---------|---------------------------------------------------------------|------------------|
| Exon 1  | F-CCCTTCGACCAAGGTGTCTGT<br>R-ACCCTTCCGCTGCCTTTATAG            | 80               |
| Exon 2  | F-TCTTCCCCTCCGATCGTCCT<br>R-CCTCCCCAAGGCGTGGAC                | 292              |
| Exon 3  | F-AAGAGAGCCTTTGGTGTGCTAAA<br>R-TACTAAGCAGCCATTCCTTGA          | 85               |
| Exon 4  | F-CATATGCCCTACTAGCTGCAGTTC<br>R-GATGTTCCAAAGATAAAGTATGTCAGGAT | 87               |
| Exon 5  | F-GGTGAGTTTAATGGTGGGATCTG<br>R-GCTGCTGGATACGAGAAAGTGTT        | 69               |
| Exon 6  | F-GTGGCTTGCAGATTGGATTCAT<br>R-TGGAAGGCAGCAGCTGTTG             | 78               |
| Exon 7  | F-GCGTGTAGCAGCAGGAAGTA<br>R-CCTTGTTTGTCAACCAAATAATG           | 250              |
| Exon 8  | F-GAAAGTTCAGCATTATTTGGTTG<br>R-GGAGTATCAGTGAAATGAAGCTTG       | 257              |
| Exon 9  | F-TCACTAGGTTTTTGCCTCCTGAA<br>R-CAGCGATGGAAAATGATGCA           | 77               |
| Exon 10 | F-CAGTCTCTTCCTTAGGAATTCATTGC<br>R-GGCCGTGCGGAAAG              | 98               |
| Exon 11 | F-GACACAAGGGAGAAGGACGA<br>R-AGGGAATGGTTTTCCATGTG              | 236              |
| Exon 12 | F-AACAATCATCACATGGAAAACC<br>R-TTATTCAGATAAATATAGGC            | 193              |
| Exon 13 | F-TTTTCCCTAGGTTATCTGGGTGTTT<br>R-AACTCTCAGGACCACAGTCAACAG     | 111              |
| Exon 14 | F-TCCAAAATACGGCTGTTCC<br>R-ATGGAGCTGCTGAAACTTCAGG             | 187              |

|         |                                                             |     |
|---------|-------------------------------------------------------------|-----|
| Exon 15 | F-CCTTGCTAAGTAGCCAGAAATG<br>R-TTGGACCCCAGTAAATACTTGT        | 254 |
| Exon 16 | F-CCTTTGAGAAATAGCCTTTCCAG<br>R-GCTCTCATCAGGGAAAGGAA         | 241 |
| Exon 17 | F-AAATAATGCTTTTGAGCCTGATGA<br>R-CCAATCCACTTGAATCTCTATTTTCCT | 87  |
| Exon 18 | F-TCCTGAGCAAGTAACTGAATGC<br>R-GAAAGGGCTTACGGGAAAGT          | 190 |
| Exon 19 | F-ACGACAACATTAGAAAGGACACATTC<br>R-ACCTTGACCCTCTTGAGATTTTCAC | 91  |
| Exon 20 | F-CAGTGGAGCATCAGGTGGG<br>R-GTTCCTGACAGTTCTTAATCAG           | 246 |
| Exon 21 | F-ACAGGCTATGCGTACACTTGCA<br>R-CATTGAGGAAGTTTTGTCTTGTATTCC   | 83  |

---

**Supplementary table 2.** Sequences of the primers and conditions used for amplification of the *SLC26A4* promoter and *FOXII*

| Gene/Region                   | Sequence (5'-3')                                    | Product size, bp | Annealing temperature, C |
|-------------------------------|-----------------------------------------------------|------------------|--------------------------|
| <i>SLC26A4 promoter</i>       |                                                     |                  |                          |
| Region 1 (c.-2988 to c.-2258) | F-AAGATACACATTTTGTGACC<br>R-AAGAGTAACTTAGCTTGG      | 731              | 56                       |
| Region 2 (c.-1063 to c.-325)  | F-TTGAAGATCTGTTGAAAGC<br>R-TTCTATATTAATAAGTCC       | 739              | 53                       |
| <i>FOXII</i>                  |                                                     |                  |                          |
| Exon 1                        | F-AGCCCAGCCCCAGCATGAGC<br>R-ACACTCAAAGCCTCC TTACC   | 607              | 64.5                     |
| Exon 2                        | F-ACCCCCTTTCACTTTTGTATC<br>R-TGGCTCAGGAGCTGTTCTGTAC | 608              | 55                       |
